# Supplementary material
Source: publisher figshare collection journal article supplement (https://frontiersin.figshare.com/ndownloader/files/40920470)
Supplement: Supplementary file [file 40920470]

## Supplementary Material

### Based on machine learning algorithms for estimating leaf phosphorus concentration of rice using optimized spectral indices and continuous wavelet transform

Yi Zhang<sup>#</sup>, Teng Wang<sup>#</sup>, Zheng Li, Tianli Wang, Ning Cao<sup>\*</sup>

<sup>\*</sup> **Correspondence:** Corresponding Author: cao\_ning@jlu.edu.cn

#### 1 Supplementary Figures and Tables

##### 1.1 Details of wavelet functions

Fifteen classic wavelet functions were used in this study, and more details were shown in Supplementary Table 1. The correlation between fifteen wavelet functions and the LPC of rice were shown in Supplementary Figure 1, and ten scales were calculated for each wavelet function. The  $R^2$  ranged from 0.36-0.53, and the transformation effect based on the Mexh function produced the highest model accuracy ( $R^2 > 0.5$ ). Therefore, the Mexh function was used as the optimal wavelet function to extract wavelet features.

**Supplementary Table 1.** Details of fifteen wavelet functions.

| Wavelet function | Family       | Orthogonal | Biorthogonal | Compact Support | Continuous Wavelet Transform | MATLAB <sup>®</sup> Command |
|------------------|--------------|------------|--------------|-----------------|------------------------------|-----------------------------|
| bior3.5          | Biorthogonal | No         | Yes          | Yes             | Possible                     | waveinfo('bior')            |
| cgau5            | Cgau         | No         | No           | No              | Possible                     | waveinfo('cgau')            |
| coif3            | Coiflets     | Yes        | Yes          | Yes             | Possible                     | waveinfo('coif')            |
| db10             | Daubechies   | Yes        | Yes          | Yes             | Possible                     | waveinfo('db')              |
| dmey             | Dmeyer       | Yes        | Yes          | Yes             | Possible                     | waveinfo('dmey')            |
| cmor1-0.5        | Cmor         | No         | No           | No              | Possible                     | waveinfo('cmor')            |
| fbsp2-1-0.5      | Fbsp         | No         | No           | No              | Possible                     | waveinfo('fbsp')            |
| gaus5            | Gaus         | No         | No           | No              | Possible                     | waveinfo('gaus')            |
| haar             | Haar         | Yes        | Yes          | Yes             | Possible                     | waveinfo('haar')            |
| mexh             | Mexican Hat  | No         | No           | No              | Possible                     | waveinfo('mexh')            |
| meyr             | Meyer        | Yes        | Yes          | No              | Possible                     | waveinfo('meyr')            |
| morl             | Morlet       | No         | No           | No              | Possible                     | waveinfo('morl')            |
| rbio4-4          | ReverseBior  | No         | Yes          | Yes             | Possible                     | waveinfo('bior')            |
| shan1-1          | Shan         | No         | No           | No              | Possible                     | waveinfo('shan')            |
| sym8             | Symlets      | Yes        | Yes          | Yes             | Possible                     | waveinfo('sym')             |

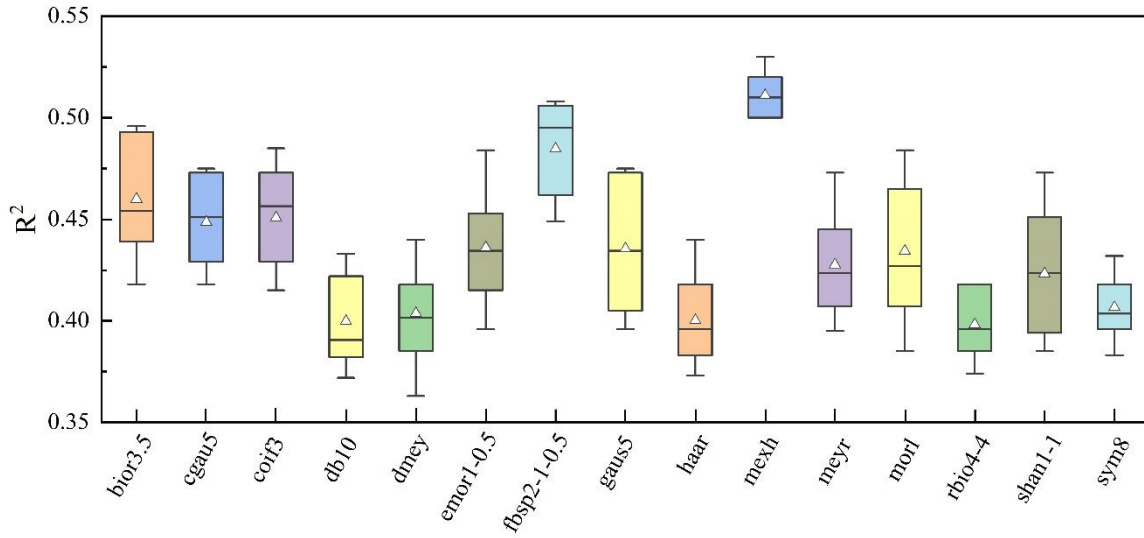

**Supplementary Figure 1.** Determination coefficient ( $R^2$ ) between the wavelet functions and rice LPC.

## 1.2 Details of machine learning algorithms

In this study, the PLSR, LASSO, RF, SVM, and BPANN programs were applied using Python (version 3.7.0, The Python Software Foundation, USA) software, and the parameters were the default settings. Detail information were shown in Supplementary Table 2.

**Supplementary Table 2.** Details of five machine learning algorithms.

| Machine learning algorithm | Parameter settings                                                                                                                                                                                                                                                                                                                                                                      |
|----------------------------|-----------------------------------------------------------------------------------------------------------------------------------------------------------------------------------------------------------------------------------------------------------------------------------------------------------------------------------------------------------------------------------------|
| PLSR                       | n_components=2    scale=True<br>max_iter=500    tol= $1 \times 10^{-6}$ copy=True<br>alpha=1.0    fit_intercept=True    normalize=False                                                                                                                                                                                                                                                 |
| LASSO                      | precompute=False    copy_X=True    max_iter=1000<br>tol=0.0001    warm_start=False    positive=False<br>random_state=None    selection='cyclic'                                                                                                                                                                                                                                         |
| RF                         | n_estimators=100    criterion='mse'    max_depth=None<br>min_samples_split=2    min_samples_leaf=1<br>min_weight_fraction_leaf=0.0    max_features='auto'<br>max_leaf_nodes=None    min_impurity_decrease=0.0<br>min_impurity_split=None    bootstrap=True    oob_score=False<br>n_jobs=None    random_state=None    verbose=0<br>warm_start=False    ccp_alpha=0.0    max_samples=None |
| SVM                        | kernel='rbf'    degree=3    gamma='scale'<br>coef0=0.0    tol=0.001    C=1.0    epsilon=0.1<br>shrinking=True    cache_size=200    verbose=False    max_iter=-1                                                                                                                                                                                                                         |

|       |                            |                                   |
|-------|----------------------------|-----------------------------------|
| BPANN | hidden_layer_sizes= (100,) | activation='relu'                 |
|       | solver='adam'              | alpha=0.0001 batch_size='auto'    |
|       | learning_rate='constant'   | learning_rate_init=0.001          |
|       | power_t=0.5                | max_iter=200 shuffle=True         |
|       | random_state=None          | tol=0.0001 verbose=False          |
|       | warm_start=False           | momentum=0.9                      |
|       | nesterovs_momentum=True    | early_stopping=False              |
|       | validation_fraction=0.1    | beta_1=0.9 beta_2=0.999           |
|       | epsilon=1×10 <sup>-8</sup> | n_iter_no_change=10 max_fun=15000 |
|       |                            |                                   |

### 1.3 Details of input variables of machine learning models

The LPC of rice was taken as the dependent variable. The independent variables were the original full band (all 2151 bands ranging from 350-2500 nm, OR), optimized SIs (10 best features), optimized CWT (10 best features), and the combination of SIs and CWT (20 input features, SIs + CWT), respectively. Supplementary Table 3 shows the details of input variables.

**Supplementary Table 3.** Details of input variables for machine learning models.

| Input variable | Variable feature                         | No. of features |
|----------------|------------------------------------------|-----------------|
| OR             | 2151 bands ranging from 350-2500 nm      | 2151            |
| SIs            | DSI (1089, 1070 nm), DSI (1090, 1071 nm) | 10              |
|                | DSI (1090, 1072 nm), DSI (1091, 1072 nm) |                 |
|                | DSI (1089, 1069 nm), RSI (1009, 990 nm)  |                 |
|                | RSI (1008, 991 nm), RSI (1004, 993 nm)   |                 |
|                | RSI (1002, 994 nm), RSI (999, 995 nm)    |                 |
| CWT            | Mexh (1550 nm, 1), Mexh (982 nm, 2)      | 10              |
|                | Mexh (983 nm, 3), Mexh (982 nm, 4)       |                 |
|                | Mexh (982 nm, 5), Mexh (1680 nm, 6)      |                 |
|                | Mexh (1679 nm, 7), Mexh (1679 nm, 8)     |                 |
|                | Mexh (982 nm, 9), Mexh (982 nm, 10)      |                 |
| SIs + CWT      | DSI (1089, 1070 nm), DSI (1090, 1071 nm) | 20              |
|                | DSI (1090, 1072 nm), DSI (1091, 1072 nm) |                 |
|                | DSI (1089, 1069 nm), RSI (1009, 990 nm)  |                 |
|                | RSI (1008, 991 nm), RSI (1004, 993 nm)   |                 |
|                | RSI (1002, 994 nm), RSI (999, 995 nm)    |                 |
|                | Mexh (1550 nm, 1), Mexh (982 nm, 2)      |                 |
|                | Mexh (983 nm, 3), Mexh (982 nm, 4)       |                 |
|                | Mexh (982 nm, 5), Mexh (1680 nm, 6)      |                 |
|                | Mexh (1679 nm, 7), Mexh (1679 nm, 8)     |                 |
|                | Mexh (982 nm, 9), Mexh (982 nm, 10)      |                 |

#### 1.4 Independent validation results of machine learning model (RF)

RF model had the best results of calibration and validation  $R^2$  in cross-validation. To determine the stability of this machine learning model, independent validation for RF model was also conducted. Wuyoudao 4 was used for model training ( $n = 240$ ), and another variety Longjing 31 was used for testing ( $n = 108$ ). Supplementary Table 4 shows the independent validation results. RF algorithm fed with the combination of SIs and CWT (RF – SIs + CWT) improved estimation accuracy while significantly reducing the number of input variables. The results were similar to the results of cross-validation. In the validation set,  $R^2$  and RMSE were 0.61 and 0.62  $\text{mg g}^{-1}$ , respectively. And the model presents the lowest AIC of 4314.77.

**Supplementary Table 4.** Independent validation results of machine learning model (RF).

| Variables | No. of bands<br>or features | Calibration dataset<br>$R^2$ | Validation dataset<br>$R^2$ | Validation dataset<br>RMSE | AIC     |
|-----------|-----------------------------|------------------------------|-----------------------------|----------------------------|---------|
| OR        | 2151                        | 0.93                         | 0.60                        | 0.62                       | 4315.34 |
| SIs       | 10                          | 0.92                         | 0.53                        | 0.63                       | 4323.74 |
| CWT       | 10                          | 0.93                         | 0.55                        | 0.63                       | 4322.42 |
| SIs + CWT | 20                          | 0.93                         | 0.61                        | 0.62                       | 4314.77 |
